# Supplementary material for: Novel mutations and mutation combinations of ryanodine receptor in a chlorantraniliprole resistant population of Plutella xylostella (L.)
Source: PubMed Central journal article supplement — Sci Rep. 2014 Nov 7;4:6924. doi: 10.1038/srep06924 (PMC4223681; doi:10.1038/srep06924), 2014-11-07
Supplement: srep06924-s1.pdf [file srep06924-s1.pdf]

Supplementary information:

**Novel mutations and mutation combinations of ryanodine receptor confers resistance to chlorantraniliprole in a field population of *Plutella xylostella* (L.)**

Lei Guo<sup>1</sup>, Pei Liang<sup>1\*</sup>, Xuguo Zhou<sup>2</sup>, Xiwu Gao<sup>1\*</sup>

<sup>1</sup>Department of Entomology, China Agricultural University, Beijing, 100193, P. R. China

<sup>2</sup>Department of Entomology, University of Kentucky, Lexington, KY 40546-0091, USA

Table S1. Location and sequences of primers used for the amplification of full length RyR cDNA from the *P. xylostella*

| Number | Position | Primer sequence             | Length of products (bp) |
|--------|----------|-----------------------------|-------------------------|
| 1      | 1        | ATG GCG GAA GCG GAA GGG     | 970                     |
|        | 970      | TTC TGG TCA TCC TTC TCT TG  |                         |
| 2      | 911      | GAG AGG AAG CCA CAA CAG     | 1478                    |
|        | 2388     | GAA ACG GCA ACT CAA CTT G   |                         |
| 3      | 2266     | ACG GTG CCT ATA ATC AAC TT  | 1473                    |
|        | 3738     | GTC CTT CGT GTA CCA GTG     |                         |
| 4      | 3518     | AGT TGC TAA TGG ATG CCC TC  | 1490                    |
|        | 5007     | CGT TTC TGG CTC CAT ACT G   |                         |
| 5      | 4804     | AGA GTT ATA CGC AGT GTG AA  | 1476                    |
|        | 6279     | GCA CGG GAT GTT CTC TTT     |                         |
| 6      | 6036     | GCA CCA TCT CAA CGA CAT     | 1490                    |
|        | 7525     | TGT AGT CTT CAT CCT CAT CTG |                         |
| 7      | 7416     | CAA GAT GAG TGA GAA GAT AGC | 1474                    |
|        | 8889     | TGG GTG AGG GTT GTA GTT     |                         |
| 8      | 8661     | GCG ACT GAA GCC TTA CAA     | 1479                    |
|        | 10139    | GAG TAA GTC TTG TCC GAG TC  |                         |
| 9      | 9983     | ATC TCA ACA AGC ACA ACC A   | 1466                    |
|        | 11448    | CTT CAG TTC GGC GTC TTC     |                         |
| 10     | 11247    | GTA TCG GTC TGT GGT GTC     | 1460                    |
|        | 12706    | GCT GTT CCA TCT TCT CCT T   |                         |
| 11     | 12512    | GTT AAT GGC ACA ATC GGT AA  | 691                     |
|        | 13202    | ATA CAT ATA CGC CGC TTC C   |                         |
| 12     | 13225    | GTG ATG ATG ATG ATG ACA GTC | 1556                    |
|        | 14780    | GAT GAT GGT GAG CAG CAT     |                         |
| 13     | 14596    | ACA ACT CGT TCC TAT ACT CTC | 759                     |
|        | 15354    | CTA CTC TCC CAT GGC GTC CTC |                         |



**Fig. S1 Sequence alignment of PxRyR segments containing three novel mutations.**

The Genbank accession number of RyR: *Plutella xylostella*, AER25354; *Ostrinia furnacalis*, AGH68757; *Helicoverpa armigera*, AHB33498; *Heliothis virescens*, (US patent: US7655395B2); *Pieris rapae*, AGI62938; *Spodoptera exigua*, AFC36359; *Bombyx mori*, XP\_004924916; *Chilo suppressalis*, AIA23856; *Cnaphalocrocis medinalis*, AFI80904; *Danaus plexippus*, EHJ73734; *Apis florea*, XP\_003696991; *Apis mellifera*, XP\_006569108; *Bombus terrestris*, XP\_003393894; *Bombus impatiens*, XP\_003484552; *Megachile rotundata*, XP\_003701507; *Nasonia vitripennis*, XP\_003425568; *Harpegnathos saltator*, EFN78897; *Drosophila melanogaster*, NP476991; *Aedes aegypti*, XP\_001657320; *Anopheles gambiae*, XP\_318561; *Anopheles darlingi*, ETN61080; *Musca domestica*, XP\_005177526; *Ceratitis capitata*, XP\_004527515; *Laodelphax striatella*, AIA23858; *Nilaparvata lugens*, AIA23857; *Bemisia tabaci*, AFK84957; *Tribolium castaneum*, XP\_008191330; *Dendroctonus ponderosae*, ENN70900; *Myzus persicae*, DD408492; *Acyrtosiphon pisum*, XP\_003246190; *Pediculus humanus corporis*, XP\_002424547.
